# Supplementary material for: Computational Study: Antioxidant Activity of Aspulvinone E Toward Hydroperoxyl and Hydroxyl Radicals
Source: Research Square preprint supplement (doi:10.21203/rs.3.rs-7678529/v1), 2025-10-16
Supplement: Supplementary file 1 [file 664c78eba78f37cba54812a6.docx]

**Supporting Information**

**Computational Study: Antioxidant Activity of Aspulvinone E Toward Hydroperoxyl and Hydroxyl Radicals**

Belma Gjergjizi Nallbani1* and Isa Degirmenci2*

1UBT – Higher Education Institution, Faculty of Pharmacy, Lagjia Kalabria 10000 Prishtina, Republic of Kosovo

E-mail: belma.nallbani@ubt-uni.net

2Chemical Engineering Department, Ondokuz Mayıs University, 55139 Samsun, Turkey

E-mail: isa.degirmenci@omu.edu.tr

Table S1. Radical stabilization energy of butenolide radicals formed after hydrogen transfer reactions.

| Radical structures formed after transfer of H-atoms | RSE (kj mol-1) |
| --- | --- |
| H1 | 97.84 |
| H2 | 96.98 |
| H3 | 137.68 |

Table S2. Computed AIP (adiabatic ionization potential), PDE (proton dissociation energy), BDE (homolytic O–H bond dissociation enthalpy), PA (proton affinity) and ETE (electron transfer enthalpy) parameters (kJ mol-1).

|  | AIP | PDE | BDE | PA | ETE |
| --- | --- | --- | --- | --- | --- |
| Butenolide | 587.43 |  |  |  |  |
| H‒1 |  | 800.11 | 327.88 | 987.90 | 1640.09 |
| H‒2 |  | 800.97 | 328.73 | 963.72 | 1640.95 |
| H‒3 |  | 760.27 | 288.03 | 897.49 | 1600.24 |

Table S3. Cartesian coordinates for transition states (TS) in the RAF mechanism with •OOH radical in M06-2X/6-31+G(d) level in water solvent media.

C1 addition pathway

| C -1.87038 1.0471 0.22495 |
| --- |
| C 1.52489 -0.07675 -0.16129 |
| C 0.73575 -1.27962 -0.45394 |
| C 0.64542 0.8556 0.26671 |
| C -0.70712 0.28855 0.26969 |
| O 0.14969 -1.25909 2.27625 |
| O -0.69977 -0.19156 2.17978 |
| H -0.42136 -2.03062 2.10482 |
| O -0.61731 -0.97225 -0.25346 |
| O 0.83164 2.10001 0.71274 |
| H 1.78122 2.25809 0.85045 |
| O 1.06164 -2.37299 -0.82032 |
| H -1.7312 2.08214 0.52676 |
| C 2.98315 0.01833 -0.26835 |
| C 3.80126 -1.06377 0.07804 |
| C 3.59169 1.20355 -0.70935 |
| C 5.18505 -0.95693 0.00543 |
| H 3.34525 -1.99357 0.40307 |
| C 4.97449 1.32094 -0.77694 |
| H 2.97475 2.03164 -1.05401 |
| C 5.77433 0.23764 -0.4135 |
| H 5.80972 -1.80493 0.27796 |
| H 5.44955 2.23225 -1.12538 |
| O 7.12348 0.40215 -0.49846 |
| H 7.57458 -0.41384 -0.23887 |
| C -3.20901 0.61167 -0.04436 |
| C -3.56049 -0.71455 -0.39599 |
| C -4.24814 1.56266 0.04698 |
| C -4.87661 -1.05965 -0.64011 |
| H -2.78887 -1.47009 -0.47863 |
| C -5.56776 1.22215 -0.19778 |
| H -4.00422 2.58643 0.31868 |
| C -5.88643 -0.0952 -0.54268 |
| H -5.15093 -2.07443 -0.90938 |
| H -6.35177 1.97201 -0.11971 |
| O -7.15634 -0.49966 -0.79446 |
| H -7.77152 0.24162 -0.69743 |

C2 addition pathway

| C 0.91689 -0.34091 -0.00368 |
| --- |
| C -0.50964 1.39268 0.18303 |
| C -1.3302 0.14059 0.25176 |
| O -0.85991 2.53439 0.23791 |
| O -2.18752 -1.22171 2.29558 |
| O -1.50084 -0.02074 2.15477 |
| H -3.12069 -0.96348 2.16955 |
| C -0.40325 -0.88943 0.06515 |
| C -2.75395 0.13077 -0.12814 |
| C -3.25801 -0.84025 -0.99867 |
| C -3.62943 1.10301 0.38341 |
| C -4.60495 -0.8497 -1.3522 |
| H -2.59176 -1.58751 -1.42144 |
| C -4.97112 1.10046 0.03397 |
| H -3.24183 1.85994 1.05797 |
| C -5.46235 0.12117 -0.83513 |
| H -4.98374 -1.6077 -2.03406 |
| H -5.65594 1.84883 0.41931 |
| O -6.78684 0.16906 -1.13768 |
| H -7.01495 -0.53813 -1.758 |
| O -0.63342 -2.20497 0.12382 |
| H -1.39704 -2.33843 0.7235 |
| O 0.81407 1.03842 0.04416 |
| C 2.0829 -1.01688 -0.09183 |
| H 1.96251 -2.09792 -0.10276 |
| C 3.44067 -0.50947 -0.17277 |
| C 3.7762 0.86092 -0.16399 |
| C 4.48784 -1.44194 -0.26334 |
| C 5.09703 1.26927 -0.2433 |
| H 2.99451 1.60761 -0.09163 |
| C 5.81388 -1.04029 -0.34325 |
| H 4.25392 -2.50361 -0.27066 |
| C 6.12104 0.32169 -0.333 |
| H 5.36018 2.322 -0.23543 |
| H 6.60776 -1.78064 -0.4125 |
| O 7.39526 0.78791 -0.40759 |
| H 8.01928 0.04981 -0.45987 |

C3 addition pathway

| C 0.54504 -1.48503 0.10339 |
| --- |
| C 1.36401 -0.28934 -0.16367 |
| C 0.46365 0.79618 -0.12985 |
| O 1.89301 1.89659 1.77142 |
| O 0.77211 1.09376 1.77804 |
| H 2.62952 1.28859 1.97419 |
| C -0.89025 0.24424 -0.09408 |
| O 0.65034 2.05322 -0.55765 |
| H 1.36378 2.44817 -0.01284 |
| C 2.80232 -0.27487 -0.25588 |
| C 3.48422 0.80165 -0.87074 |
| C 3.57414 -1.33509 0.266 |
| C 4.86547 0.82907 -0.94431 |
| H 2.91652 1.60264 -1.33306 |
| C 4.95889 -1.30657 0.19725 |
| H 3.07262 -2.1804 0.7237 |
| C 5.60997 -0.22519 -0.40433 |
| H 5.38975 1.64813 -1.42551 |
| H 5.53877 -2.12903 0.61027 |
| O 0.86767 -2.63228 0.26429 |
| O -0.78493 -1.1134 0.11446 |
| C -2.0348 0.92704 -0.21736 |
| H -1.89489 1.99555 -0.36434 |
| C -3.40908 0.43936 -0.18535 |
| C -4.44354 1.3689 -0.36648 |
| C -3.76068 -0.90969 0.01605 |
| C -5.77809 0.98329 -0.35078 |
| H -4.19611 2.41603 -0.52224 |
| C -5.08948 -1.30306 0.03285 |
| H -2.98626 -1.65355 0.16189 |
| C -6.10286 -0.35877 -0.15048 |
| H -6.56374 1.72216 -0.49281 |
| H -5.36537 -2.34102 0.18833 |
| O 6.95947 -0.143 -0.50099 |
| H 7.37385 -0.92861 -0.1151 |
| O -7.38664 -0.80848 -0.12284 |
| H -8.00017 -0.07258 -0.2597 |

Table S4. Cartesian coordinates for transition states (TS) in the RAF mechanism with •OH radical in M06-2X/6-31+G(d) level in water solvent media.

C1 addition pathway

| C 1.85278 -1.01306 0.04391 |
| --- |
| C -1.55327 0.15919 -0.07429 |
| C -0.76149 1.39245 -0.12163 |
| C -0.66563 -0.84856 0.08939 |
| C 0.69038 -0.30253 0.11947 |
| O 0.76813 -0.44845 2.27195 |
| O 0.59458 1.05119 -0.05626 |
| O -0.84199 -2.16193 0.2503 |
| H 0.02057 -2.60149 0.34038 |
| O -1.09354 2.54262 -0.21071 |
| H 1.71786 -2.0874 0.13583 |
| C -3.01537 0.0953 -0.14029 |
| C -3.78129 1.2561 -0.30322 |
| C -3.68138 -1.13513 -0.02893 |
| C -5.16898 1.19268 -0.33139 |
| H -3.28344 2.21443 -0.41101 |
| C -5.06799 -1.20627 -0.04892 |
| H -3.10974 -2.05994 0.02151 |
| C -5.81377 -0.03746 -0.19509 |
| H -5.75191 2.10198 -0.45626 |
| H -5.58542 -2.15644 0.03048 |
| O -7.17551 -0.16216 -0.20935 |
| H -7.42326 -1.09177 -0.10116 |
| C 3.20778 -0.5242 -0.08169 |
| C 3.55091 0.84225 -0.17593 |
| C 4.2489 -1.47009 -0.10665 |
| C 4.87332 1.23376 -0.28657 |
| H 2.77395 1.59738 -0.16261 |
| C 5.57501 -1.08505 -0.22107 |
| H 4.00783 -2.52708 -0.03366 |
| C 5.88898 0.27298 -0.31066 |
| H 5.14442 2.28179 -0.35757 |
| H 6.36376 -1.83256 -0.23941 |
| O 7.16838 0.72552 -0.42235 |
| H 7.179 1.6931 -0.46352 |
| H 1.60141 0.05039 2.37592 |

C2 addition pathway

| C 0.80949 -0.36404 0.0609 |
| --- |
| C -0.64819 1.34224 -0.21613 |
| C -1.43913 0.13623 0.10941 |
| O -0.99706 2.45814 -0.47641 |
| O -1.39705 0.53655 2.21508 |
| C -0.52648 -0.89025 0.20826 |
| C -2.89353 0.0382 -0.04581 |
| C -3.54765 -1.18001 0.16415 |
| C -3.64756 1.15507 -0.43424 |
| C -4.92751 -1.28525 0.01145 |
| H -2.97677 -2.07311 0.40983 |
| C -5.01931 1.05588 -0.59715 |
| H -3.14055 2.10082 -0.59168 |
| C -5.6619 -0.1639 -0.36813 |
| H -5.42354 -2.23879 0.17309 |
| H -5.6151 1.91237 -0.89492 |
| O -7.01772 -0.1941 -0.53956 |
| H -7.35521 -1.08243 -0.35434 |
| O -0.73029 -2.17899 0.47629 |
| H 0.12324 -2.64762 0.47484 |
| O 0.70028 0.99455 -0.18351 |
| C 1.96754 -1.04307 0.15401 |
| H 1.84274 -2.1035 0.36264 |
| C 3.33076 -0.563 0.00942 |
| C 3.66823 0.77603 -0.2741 |
| C 4.37497 -1.4904 0.15773 |
| C 4.99175 1.16107 -0.40104 |
| H 2.8866 1.51647 -0.39494 |
| C 5.70369 -1.11259 0.03224 |
| H 4.13851 -2.5285 0.37558 |
| C 6.01302 0.21911 -0.24824 |
| H 5.25842 2.18982 -0.61924 |
| H 6.49621 -1.8469 0.15107 |
| O 7.29448 0.6639 -0.38575 |
| H 7.2995 1.61433 -0.57127 |
| H -0.44026 0.58295 2.41067 |

C3 addition pathway

| C -0.6614 1.40773 0.00109 |
| --- |
| C -1.46532 0.1681 -0.03851 |
| C -0.54749 -0.86738 0.05685 |
| O -1.09658 -0.84508 2.15385 |
| C 0.79468 -0.31427 -0.0016 |
| O -0.73386 -2.19671 -0.04681 |
| H 0.14484 -2.60396 0.07646 |
| C -2.90857 0.11745 -0.13214 |
| C -3.57828 -1.12088 -0.19432 |
| C -3.67382 1.29585 -0.16685 |
| C -4.9583 -1.18126 -0.27769 |
| H -3.00626 -2.043 -0.20915 |
| C -5.05723 1.23922 -0.24478 |
| H -3.17642 2.25811 -0.12804 |
| C -5.70196 0.0014 -0.29738 |
| H -5.47936 -2.13095 -0.33486 |
| H -5.63922 2.15731 -0.26266 |
| O -0.99858 2.56164 -0.00036 |
| O 0.68178 1.06331 0.00836 |
| C 1.9481 -0.99989 -0.0334 |
| H 1.81463 -2.07947 -0.02309 |
| C 3.31601 -0.50662 -0.08663 |
| C 4.35489 -1.44948 -0.12669 |
| C 3.66046 0.85943 -0.10041 |
| C 5.68615 -1.06106 -0.17786 |
| H 4.11299 -2.50894 -0.11754 |
| C 4.98641 1.25581 -0.15072 |
| H 2.88278 1.61342 -0.07044 |
| C 6.00267 0.29763 -0.18937 |
| H 6.47463 -1.80863 -0.20861 |
| H 5.25802 2.30617 -0.1608 |
| O -7.05726 -0.11806 -0.37476 |
| H -7.30826 -1.05307 -0.4013 |
| O 7.28775 0.75439 -0.23784 |
| H 7.29788 1.72204 -0.20355 |
| H -0.23271 -0.57887 2.52285 |
